# Supplementary material
Source: Research Square preprint supplement (doi:10.21203/rs.3.rs-9228563/v1)
Supplement: Supplementary file 1 [file 93c6f0c6637be5ca6f4595ec.docx]

**Table1 baseline characteristic of patients**

| **Variable** | **HER2+ (n=)** | | **HER2++ (n=)** | | **HER2+++ (n=)** | | **P value** | |  |
| --- | --- | --- | --- | --- | --- | --- | --- | --- | --- |
| Age | 50.00 (44.00-58.00) | 51.00 (44.00-58.00) | | 54.50 (49.50-57.50) | | 0.731 | |
| Redness_Pain |  |  | |  | | 0.001 | |
| Yes | 7 (17.1%) | 24 (42.1%) | | 1 (5.0%) | |  | |
| No | 34 (82.9%) | 33 (57.9%) | | 19 (95.0%) | |  | |
| Nipple_Discharge |  |  | |  | | 0.563 | |
| Yes | 3 (7.3%) | 3 (5.3%) | | 0 (0.0%) | |  | |
| No | 38 (92.7%) | 54 (94.7%) | | 20 (100.0%) | |  | |
| Laterality |  |  | |  | | 0.559 | |
| Left | 18 (43.9%) | 19 (33.3%) | | 8 (40.0%) | |  | |
| Right | 23 (56.1%) | 38 (66.7%) | | 12 (60.0%) | |  | |
| BPE |  |  | |  | | 0.920 | |
| Minimal | 24 (58.5%) | 32 (56.1%) | | 10 (50.0%) | |  | |
| Mild | 13 (31.7%) | 19 (33.3%) | | 9 (45.0%) | |  | |
| Moderate | 4 (9.8%) | 6 (10.5%) | | 1 (5.0%) | |  | |
| Marked | 0 (0.0%) | 0 (0.0%) | | 0 (0.0%) | |  | |
| FGT |  |  | |  | | 0.231 | |
| Almost entirely fatty | 5 (12.2%) | 7 (12.3%) | | 5 (25.0%) | |  | |
| Scattered fibroglandular tissue | 14 (34.1%) | 17 (29.8%) | | 7 (35.0%) | |  | |
| Heterogeneously dense | 14 (34.1%) | 20 (35.1%) | | 6 (30.0%) | |  | |
| Extremely dense | 8 (19.5%) | 13 (22.8%) | | 2 (10.0%) | |  | |
| Quadrant |  |  | |  | | 0.267 | |
| Upper outer | 13 (31.7%) | 20 (35.1%) | | 6 (30.0%) | |  | |
| Lower outer | 2 (4.9%) | 9 (15.8%) | | 7 (35.0%) | |  | |
| Upper inner | 14 (34.1%) | 14 (24.6%) | | 2 (10.0%) | |  | |
| Lower inner | 5 (12.2%) | 7 (12.3%) | | 3 (15.0%) | |  | |
| Retroareolar | 3 (7.3%) | 3 (5.3%) | | 1 (5.0%) | |  | |
| Central | 4 (9.8%) | 4 (7.0%) | | 1 (5.0%) | |  | |
| Focus_num |  |  | |  | | 0.151 | |
| Single | 27 (65.9%) | 42 (73.7%) | | 10 (50.0%) | |  | |
| Multiple | 14 (34.1%) | 15 (26.3%) | | 10 (50.0%) | |  | |
| X_Margin |  |  | |  | | 0.458 | |
| Well-defined | 3 (7.3%) | 3 (5.3%) | | 1 (5.0%) | |  | |
| Obscured | 1 (2.4%) | 1 (1.8%) | | 2 (10.0%) | |  | |
| Lobulated | 13 (31.7%) | 24 (42.1%) | | 5 (25.0%) | |  | |
| Ill-defined | 18 (43.9%) | 16 (28.1%) | | 7 (35.0%) | |  | |
| Spiculated | 6 (14.6%) | 13 (22.8%) | | 5 (25.0%) | |  | |
| X_Shape |  |  | |  | | 0.488 | |
| Round | 1 (2.4%) | 5 (8.8%) | | 2 (10.0%) | |  | |
| Oval | 14 (34.1%) | 14 (24.6%) | | 7 (35.0%) | |  | |
| Irregular | 26 (63.4%) | 38 (66.7%) | | 11 (55.0%) | |  | |
| MRI_Enhance |  |  | |  | | 0.195 | |
| Punctate | 0 (0.0%) | 0 (0.0%) | | 0 (0.0%) | |  | |
| Mass | 20 (48.8%) | 35 (61.4%) | | 8 (40.0%) | |  | |
| Non-mass | 21 (51.2%) | 22 (38.6%) | | 12 (60.0%) | |  | |
| MRI_MassShape |  |  | |  | | 0.258 | |
| Round | 1 (2.4%) | 2 (3.5%) | | 1 (5.0%) | |  | |
| Oval | 16 (39.0%) | 20 (35.1%) | | 12 (60.0%) | |  | |
| Irregular | 24 (58.5%) | 35 (61.4%) | | 7 (35.0%) | |  | |
| MRI_Margin |  |  | |  | | 0.382 | |
| Smooth | 9 (22.0%) | 7 (12.3%) | | 2 (10.0%) | |  | |
| Irregular | 32 (78.0%) | 50 (87.7%) | | 18 (90.0%) | |  | |
| MRI_Internal |  |  | |  | | 0.807 | |
| Homogeneous | 6 (14.6%) | 6 (10.5%) | | 1 (5.0%) | |  | |
| Heterogeneous | 30 (73.2%) | 43 (75.4%) | | 15 (75.0%) | |  | |
| Rim | 5 (12.2%) | 8 (14.0%) | | 4 (20.0%) | |  | |
| Low-signal septations | 0 (0.0%) | 0 (0.0%) | | 0 (0.0%) | |  | |
| MRI_NonmassShape |  |  | |  | | 0.688 | |
| Focal | 7 (17.1%) | 9 (15.8%) | | 2 (10.0%) | |  | |
| Linear | 7 (17.1%) | 10 (17.5%) | | 8 (40.0%) | |  | |
| Segmental | 16 (39.0%) | 16 (28.1%) | | 4 (20.0%) | |  | |
| Regional | 2 (4.9%) | 6 (10.5%) | | 2 (10.0%) | |  | |
| Multiple regions | 7 (17.1%) | 11 (19.3%) | | 3 (15.0%) | |  | |
| Diffuse | 2 (4.9%) | 5 (8.8%) | | 1 (5.0%) | |  | |
| MRI_NonmassInternal |  |  | |  | | 0.461 | |
| Homogeneous | 2 (4.9%) | 0 (0.0%) | | 1 (5.0%) | |  | |
| Heterogeneous | 15 (36.6%) | 24 (42.1%) | | 7 (35.0%) | |  | |
| Clumped | 12 (29.3%) | 14 (24.6%) | | 3 (15.0%) | |  | |
| Clustered | 12 (29.3%) | 19 (33.3%) | | 9 (45.0%) | |  | |
| DWI |  |  | |  | | 0.275 | |
| Markedly restricted | 34 (82.9%) | 49 (86.0%) | | 14 (70.0%) | |  | |
| Mildly restricted | 7 (17.1%) | 8 (14.0%) | | 6 (30.0%) | |  | |
| Not restricted | 0 (0.0%) | 0 (0.0%) | | 0 (0.0%) | |  | |
| TIC |  |  | |  | | 0.256 | |
| TIC I | 5 (12.2%) | 1 (1.8%) | | 2 (10.0%) | |  | |
| TIC II | 16 (39.0%) | 21 (36.8%) | | 5 (25.0%) | |  | |
| TIC III | 20 (48.8%) | 35 (61.4%) | | 13 (65.0%) | |  | |
| Nipple_Retract |  |  | |  | | 0.501 | |
| Yes | 3 (7.3%) | 9 (15.8%) | | 2 (10.0%) | |  | |
| No | 38 (92.7%) | 48 (84.2%) | | 18 (90.0%) | |  | |
| Skin_Thick |  |  | |  | | 0.302 | |
| Yes | 3 (7.3%) | 8 (14.0%) | | 4 (20.0%) | |  | |
| No | 38 (92.7%) | 49 (86.0%) | | 16 (80.0%) | |  | |
| Pectoral_Inv |  |  | |  | | 1.000 | |
| Yes | 1 (2.4%) | 2 (3.5%) | | 0 (0.0%) | |  | |
| No | 40 (97.6%) | 55 (96.5%) | | 20 (100.0%) | |  | |
| ChestWall_Inv |  |  | |  | | 1.000 | |
| Yes | 1 (2.4%) | 1 (1.8%) | | 0 (0.0%) | |  | |
| Yes | 40 (97.6%) | 56 (98.2%) | | 20 (100.0%) | |  | |
| LymphNode |  |  | |  | | 0.019 | |
| No | 31 (75.6%) | 30 (52.6%) | | 8 (40.0%) | |  | |
| Single | 6 (14.6%) | 18 (31.6%) | | 7 (35.0%) | |  | |
| Multiple | 4 (9.8%) | 9 (15.8%) | | 5 (25.0%) | |  | |
| Path_Grade | 5.00 (4.00-5.00) | 5.00 (4.75-5.00) | | 6.00 (6.00-6.00) | | 0.149 | |
| Pathology |  |  | |  | | 0.931 | |
| Ductal carcinoma in situ | 4 (9.8%) | 7 (12.3%) | | 3 (15.0%) | |  | |
| Invasive ductal carcinoma | 33 (80.5%) | 46 (80.7%) | | 17 (85.0%) | |  | |
| Lobular carcinoma in situ | 2 (4.9%) | 1 (1.8%) | | 0 (0.0%) | |  | |
| Invasive lobular carcinoma | 2 (4.9%) | 3 (5.3%) | | 0 (0.0%) | |  | |
| Her2 |  |  | |  | | 0.000 | |
| 1+ | 41 (100.0%) | 0 (0.0%) | | 0 (0.0%) | |  | |
| 2+ | 0 (0.0%) | 57 (100.0%) | | 0 (0.0%) | |  | |
| 3+ | 0 (0.0%) | 0 (0.0%) | | 20 (100.0%) | |  | |

**Table2. Model performance metrics for HER2 classification**

| models | set | AUC | precision | recall | accuracy | F1 |
| --- | --- | --- | --- | --- | --- | --- |
| Alexnet | training | 0.977[0.972-0.982] | 0.898[0.887-0.910] | 0.898[0.877-0.917] | 0.898[0.923-0.940] | 0.897[0.887-0.907] |
| valiation | 0.977[0.965-0.988] | 0.901[0.877-0.923] | 0.895[0.850-0.940] | 0.894[0.910-0.953] | 0.895[0.867-0.920] |
| testing | 0.971[0.959-0.984] | 0.851[0.823-0.880] | 0.862[0.810-0.913] | 0.864[0.890-0.933] | 0.854[0.827-0.883] |
| Resent-34 | training | 0.955[0.947-0.963] | 0.856[0.840-0.870] | 0.860[0.840-0.887] | 0.863[0.897-0.920] | 0.857[0.843-0.870] |
| valiation | 0.957[0.940-0.973] | 0.851[0.823-0.883] | 0.845[0.793-0.900] | 0.851[0.877-0.923] | 0.847[0.820-0.877] |
| testing | 0.949[0.929-0.968] | 0.820[0.790-0.850] | 0.826[0.767-0.883] | 0.843[0.867-0.920] | 0.823[0.790-0.853] |
| swintransformer | training | 0.949[0.941-0.958] | 0.836[0.823-0.853] | 0.848[0.823-0.870] | 0.845[0.883-0.907] | 0.841[0.830-0.857] |
| valiation | 0.948[0.930-0.966] | 0.848[0.817-0.877] | 0.857[0.807-0.907] | 0.851[0.873-0.927] | 0.852[0.823-0.880] |
| testing | 0.941[0.921-0.962] | 0.832[0.800-0.863] | 0.854[0.800-0.907] | 0.852[0.877-0.927] | 0.841[0.810-0.870] |
| DenseNet121 | training | 0.946[0.937-0.955] | 0.827[0.813-0.840] | 0.838[0.813-0.863] | 0.838[0.883-0.903] | 0.832[0.820-0.847] |
| valiation | 0.951[0.933-0.969] | 0.839[0.807-0.870] | 0.840[0.783-0.897] | 0.842[0.867-0.920] | 0.839[0.810-0.870] |
| testing | 0.952[0.935-0.970] | 0.815[0.787-0.847] | 0.828[0.767-0.887] | 0.835[0.863-0.917] | 0.820[0.787-0.850] |
| Inception | training | 0.857[0.840-0.874] | 0.723[0.707-0.740] | 0.737[0.707-0.763] | 0.730[0.807-0.833] | 0.722[0.707-0.737] |
| valiation | 0.866[0.832-0.900] | 0.735[0.700-0.770] | 0.748[0.683-0.810] | 0.743[0.797-0.860] | 0.735[0.700-0.770] |
| testing | 0.872[0.836-0.908] | 0.712[0.673-0.747] | 0.743[0.680-0.807] | 0.733[0.793-0.853] | 0.718[0.680-0.753] |
| vggnet16 | training | 0.966[0.959-0.972] | 0.868[0.857-0.880] | 0.868[0.843-0.890] | 0.868[0.900-0.923] | 0.867[0.853-0.880] |
| valiation | 0.965[0.949-0.980] | 0.874[0.847-0.900] | 0.872[0.823-0.923] | 0.876[0.897-0.937] | 0.872[0.847-0.897] |
| testing | 0.957[0.940-0.975] | 0.840[0.810-0.870] | 0.855[0.800-0.907] | 0.853[0.877-0.927] | 0.847[0.820-0.877] |
